# Supplementary material for: The B-type cyclin Clb4 prevents meiosis I sister centromere separation in budding yeast
Source: PubMed Central journal article supplement — bioRxiv. 2024 Dec 19:2024.12.18.629243. Preprint. [Version 1] doi: 10.1101/2024.12.18.629243 (PMC11702657; doi:10.1101/2024.12.18.629243), 2024-12-19
Supplement: NIHPP2024.12.18.629243v1-supplement-2.pdf [file NIHPP2024.12.18.629243v1-supplement-2.pdf]

## Supplementary figures

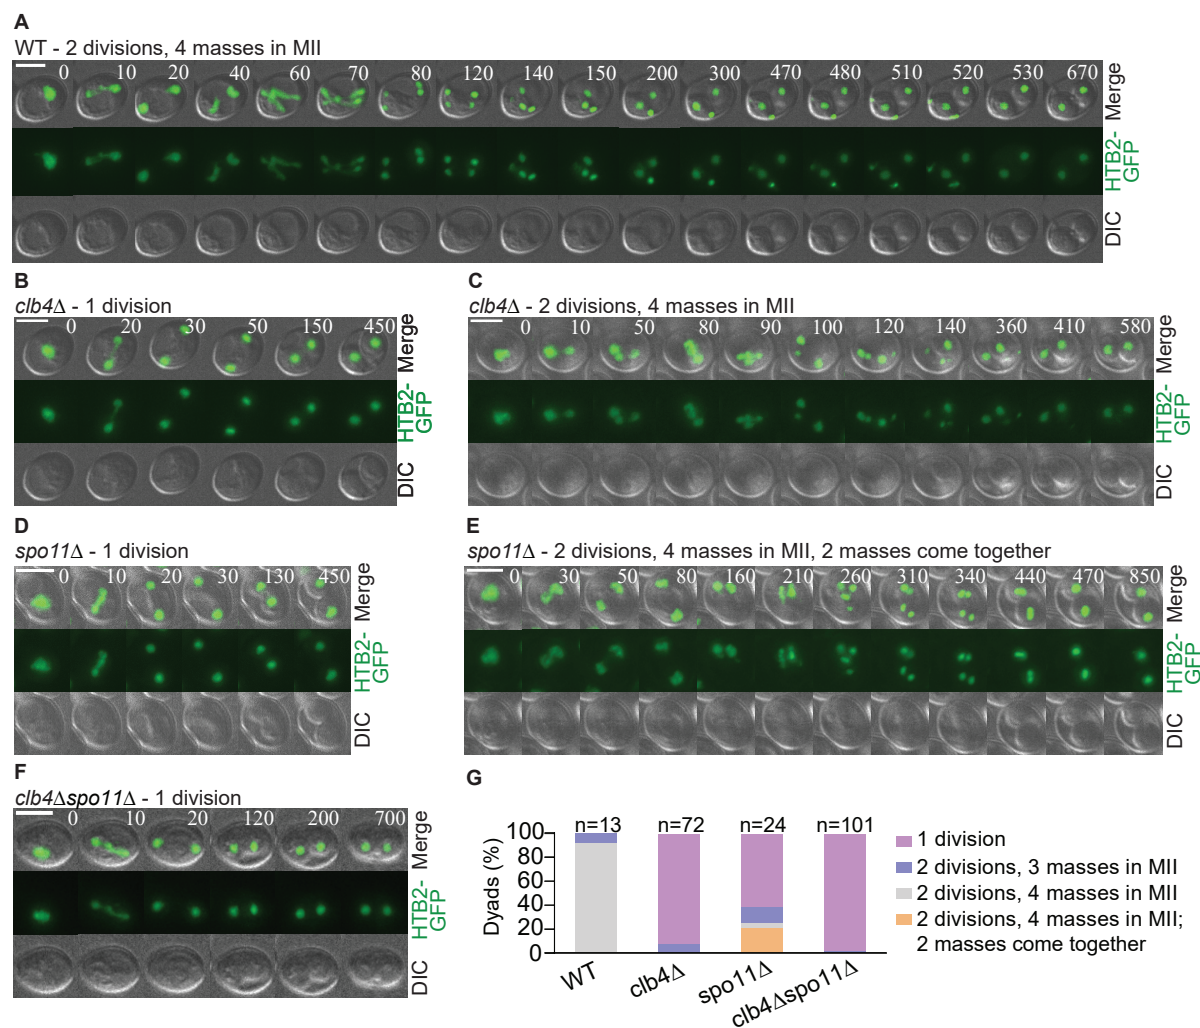

**Figure S1. Meiotic chromatin mass divisions in *CLB4* and *SPO11* mutants.** (A-F) Representative images from time lapse movies of sporulation with fluorescently labeled histone H2B (HTB2-GFP) in wild-type (WT, LY9981), *clb4Δ* (LY9982), *spo11Δ* (LY10028) and *clb4Δ spo11Δ* (LY9983). All deletions were homozygous. (G) Fraction of dyads observed forming in time lapse movies that underwent the listed division pattern. The number of dyads formed after 1 or 2 chromatin mass divisions was compared between the following strains using a chi-square test: wild-type (WT) vs. *clb4Δ*,  $\chi^2(df = 1, N = 85) = 57.13, p < 0.00001$ ; *spo11Δ* vs *clb4Δ spo11Δ*,  $\chi^2(df = 1, N = 125) = 35.12, p < 0.00001$ .

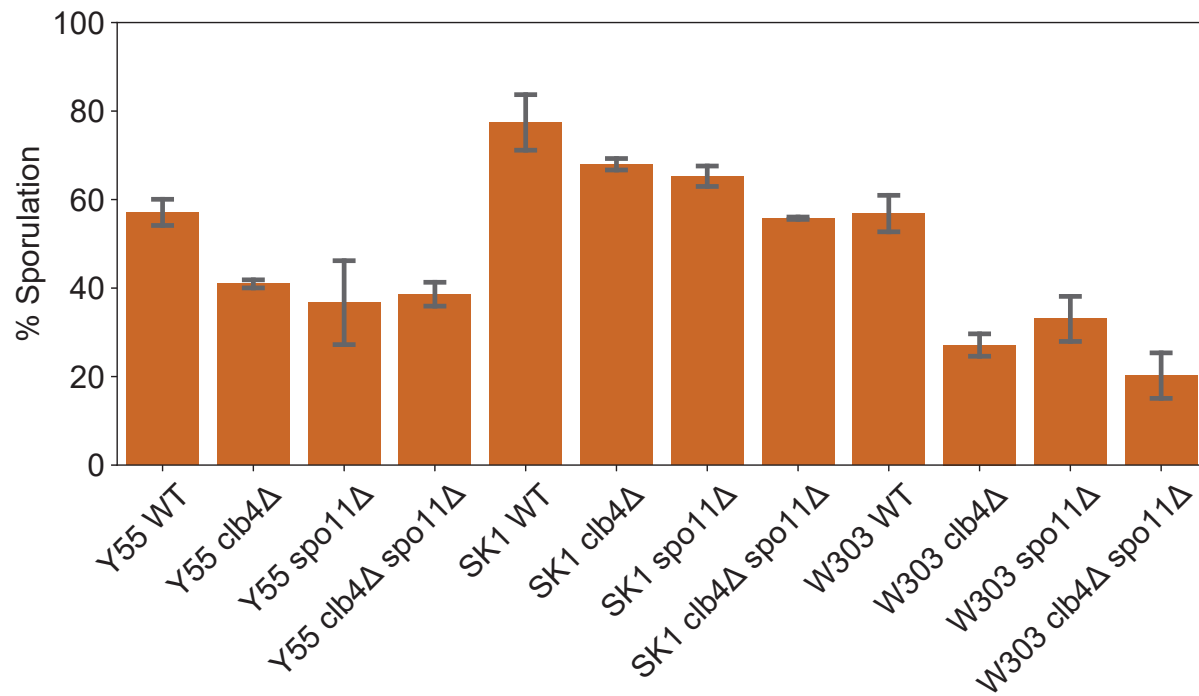

**Figure S2. Sporulation fraction of *CLB4* mutants.** The fraction of sporulated cells (asci) in the cultures assayed for figure 3.

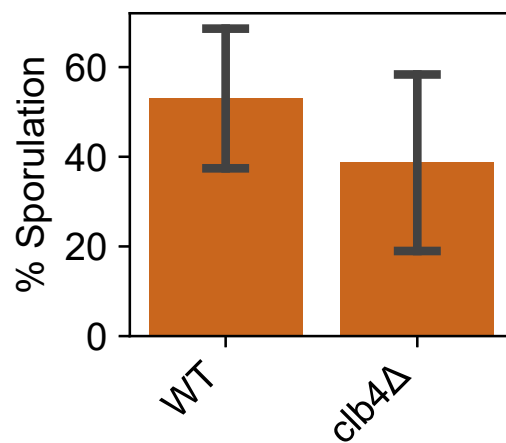

**Figure S3. Sporulation fraction of meiotic time course cultures** The fraction of sporulated cells (asci) in the cultures assayed for figure 5.

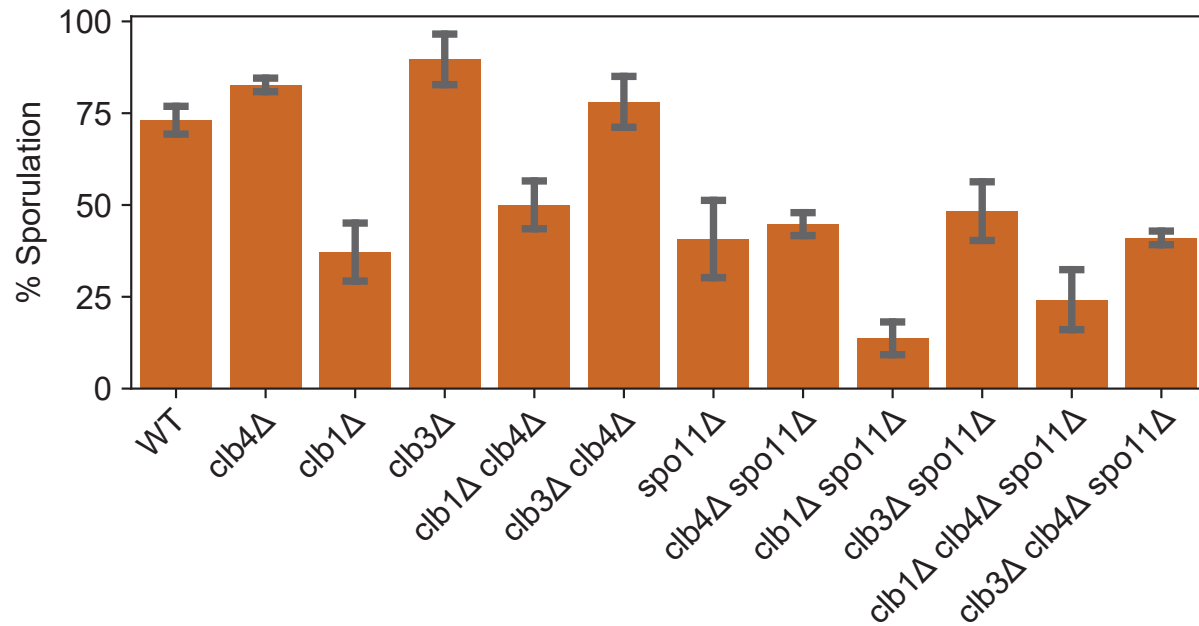

**Figure S4. Sporulation fraction of *CLB* mutants.** The fraction of sporulated cells (asci) in the cultures assayed for figure 7.

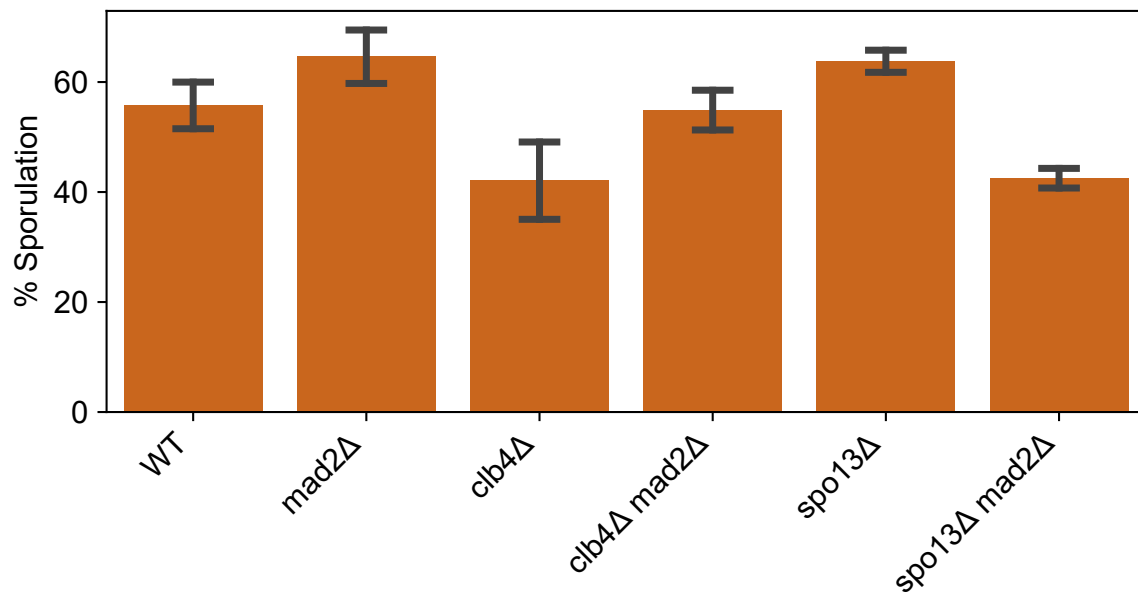

**Figure S5. Sporulation fraction of *MAD2* mutants.** The fraction of sporulated cells (asci) in the cultures assayed for figure 6.
